# Supplementary material
Source: PubMed Central journal article supplement (PMC3198487)
Supplement: supp_10-1296_Online_Supplement.pdf [file supp_10-1296_Online_Supplement.pdf]

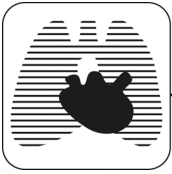

## **CURB-65 Pneumonia Severity Assessment Adapted for Electronic Decision Support**

*Barbara E. Jones, MD; Jason Jones, PhD; Thomas Bewick, MD; Wei Shen Lim, MD;  
Dominik Aronsky, MD, PhD; Samuel M. Brown, MD; Wim G. Boersma, MD;  
Menno M. van der Eerden, MD; and Nathan C. Dean, MD, FCCP*

*Online supplements are not copyedited prior to posting.*

**Instructions:** Enter patient values into columns A through E.  
 Predicted mortality is provided in column U

**Details:** Age, BUN, and RR are transformed using the relevant "spline" lookup sheets.  
 The logistic regression estimate is produced in columns G through T.

| Raw Patient Data |          |           |          |           | Spline Transformed Values  |        |       |       |          |        |       |        |        |       |       | Results  |        |              |
|------------------|----------|-----------|----------|-----------|----------------------------|--------|-------|-------|----------|--------|-------|--------|--------|-------|-------|----------|--------|--------------|
| Age              | Confused | First BUN | First RR | First SBP | <i>Parameter Estimates</i> |        |       |       |          |        |       |        |        |       |       | Estimate | Final  |              |
|                  |          |           |          |           | Int                        | Age1   | Age2  | Age3  | Confused | BUN1   | BUN2  | BUN3   | RR1    | RR2   | RR3   |          |        | SBP          |
| 62               | 0        | 44        | 28       | 95        | 1                          | 0.414  | 0.442 | ###   | 0        | 0.046  | 0.605 | -0.284 | 0.333  | 0.480 | ###   | 95       | -1.790 | <b>14.3%</b> |
| 77               | 0        | 14        | 20       | 100       | 1                          | 0.513  | 0.331 | 0.069 | 0        | -0.313 | 0.720 | -0.365 | -0.121 | 0.667 | ###   | 100      | -3.751 | <b>2.3%</b>  |
| 85               | 0        | 15        | 24       | 192       | 1                          | 0.354  | 0.338 | 0.284 | 0        | -0.307 | 0.729 | -0.370 | 0.155  | 0.566 | ###   | 192      | -3.174 | <b>4.0%</b>  |
| 83               | 0        | 27        | 16       | 143       | 1                          | 0.404  | 0.333 | 0.228 | 0        | -0.148 | 0.681 | -0.342 | -0.215 | 0.511 | ###   | 143      | -3.186 | <b>4.0%</b>  |
| 68               | 0        | 15        | 18       | 152       | 1                          | 0.522  | 0.377 | ###   | 0        | -0.307 | 0.729 | -0.370 | -0.220 | 0.649 | ###   | 152      | -4.632 | <b>1.0%</b>  |
| 59               | 0        | 8         | 20       | 130       | 1                          | 0.337  | 0.477 | ###   | 0        | -0.229 | 0.477 | -0.242 | -0.121 | 0.667 | ###   | 130      | -5.004 | <b>0.7%</b>  |
| 68               | 0        | 11        | 24       | 182       | 1                          | 0.522  | 0.377 | ###   | 0        | -0.298 | 0.641 | -0.325 | 0.155  | 0.566 | ###   | 182      | -4.181 | <b>1.5%</b>  |
| 25               | 0        | 10        | 20       | 109       | 1                          | -0.069 | 0.201 | ###   | 0        | -0.280 | 0.594 | -0.302 | -0.121 | 0.667 | ###   | 109      | -4.445 | <b>1.2%</b>  |
| 28               | 0        | 10        | 24       | 128       | 1                          | -0.093 | 0.281 | ###   | 0        | -0.280 | 0.594 | -0.302 | 0.155  | 0.566 | ###   | 128      | -4.008 | <b>1.8%</b>  |
| 48               | 0        | 10        | 28       | 98        | 1                          | 0.035  | 0.562 | ###   | 0        | -0.280 | 0.594 | -0.302 | 0.333  | 0.480 | ###   | 98       | -3.739 | <b>2.3%</b>  |
| 55               | 0        | 10        | 28       | 124       | 1                          | 0.224  | 0.520 | ###   | 0        | -0.280 | 0.594 | -0.302 | 0.333  | 0.480 | ###   | 124      | -3.827 | <b>2.1%</b>  |
| 44               | 0        | 9         | 24       | 111       | 1                          | -0.044 | 0.555 | ###   | 0        | -0.257 | 0.539 | -0.274 | 0.155  | 0.566 | ###   | 111      | -4.314 | <b>1.3%</b>  |
| 63               | 0        | 32        | 16       | 75        | 1                          | 0.437  | 0.430 | ###   | 0        | -0.086 | 0.657 | -0.326 | -0.215 | 0.511 | ###   | 75       | -3.422 | <b>3.2%</b>  |
| 75               | 0        | 20        | 16       | 103       | 1                          | 0.533  | 0.336 | 0.020 | 0        | -0.242 | 0.716 | -0.362 | -0.215 | 0.511 | ###   | 103      | -3.717 | <b>2.4%</b>  |
| 45               | 0        | 8         | 20       | 128       | 1                          | -0.027 | 0.559 | ###   | 0        | -0.229 | 0.477 | -0.242 | -0.121 | 0.667 | ###   | 128      | -5.144 | <b>0.6%</b>  |
| 37               | 0        | 19        | 20       | 107       | 1                          | -0.111 | 0.476 | ###   | 0        | -0.257 | 0.721 | -0.365 | -0.121 | 0.667 | ###   | 107      | -4.238 | <b>1.4%</b>  |
| 57               | 0        | 46        | 16       | 100       | 1                          | 0.282  | 0.499 | ###   | 0        | 0.065  | 0.597 | -0.277 | -0.215 | 0.511 | ###   | 100      | -3.163 | <b>4.1%</b>  |
| 54               | 0        | 14        | 28       | 102       | 1                          | 0.196  | 0.529 | ###   | 0        | -0.313 | 0.720 | -0.365 | 0.333  | 0.480 | ###   | 102      | -3.458 | <b>3.1%</b>  |
| 84               | 0        | 26        | 22       | 97        | 1                          | 0.380  | 0.335 | 0.256 | 0        | -0.161 | 0.686 | -0.345 | 0.025  | 0.619 | ###   | 97       | -2.362 | <b>8.6%</b>  |
| 91               | 1        | 55        | 36       | 100       | 1                          | 0.173  | 0.362 | 0.459 | 1        | 0.145  | 0.562 | -0.243 | 0.421  | 0.379 | 0.080 | 100      | 1.537  | <b>82.3%</b> |
| 36               | 0        | 11        | 20       | 107       | 1                          | -0.114 | 0.459 | ###   | 0        | -0.298 | 0.641 | -0.325 | -0.121 | 0.667 | ###   | 107      | -4.692 | <b>0.9%</b>  |

| <b>age</b> | <b>ageX1</b> | <b>ageX2</b> | <b>ageX3</b> |
|------------|--------------|--------------|--------------|
| 18         | 0.00000      | 0.00000      | 0.00000      |
| 19         | -0.01055     | 0.02929      | -0.01873     |
| 20         | -0.02102     | 0.05850      | -0.03741     |
| 21         | -0.03133     | 0.08758      | -0.05601     |
| 22         | -0.04141     | 0.11644      | -0.07447     |
| 23         | -0.05117     | 0.14502      | -0.09275     |
| 24         | -0.06054     | 0.17325      | -0.11080     |
| 25         | -0.06943     | 0.20105      | -0.12858     |
| 26         | -0.07778     | 0.22836      | -0.14605     |
| 27         | -0.08550     | 0.25511      | -0.16315     |
| 28         | -0.09251     | 0.28122      | -0.17985     |
| 29         | -0.09874     | 0.30662      | -0.19610     |
| 30         | -0.10410     | 0.33125      | -0.21185     |
| 31         | -0.10852     | 0.35503      | -0.22705     |
| 32         | -0.11192     | 0.37789      | -0.24168     |
| 33         | -0.11421     | 0.39977      | -0.25567     |
| 34         | -0.11533     | 0.42059      | -0.26898     |
| 35         | -0.11519     | 0.44027      | -0.28157     |
| 36         | -0.11372     | 0.45876      | -0.29339     |
| 37         | -0.11083     | 0.47598      | -0.30440     |
| 38         | -0.10644     | 0.49185      | -0.31456     |
| 39         | -0.10049     | 0.50631      | -0.32381     |
| 40         | -0.09289     | 0.51930      | -0.33211     |
| 41         | -0.08355     | 0.53072      | -0.33942     |
| 42         | -0.07241     | 0.54053      | -0.34569     |
| 43         | -0.05939     | 0.54864      | -0.35087     |
| 44         | -0.04439     | 0.55499      | -0.35493     |
| 45         | -0.02736     | 0.55950      | -0.35782     |
| 46         | -0.00825     | 0.56213      | -0.35950     |
| 47         | 0.01277      | 0.56298      | -0.35998     |
| 48         | 0.03548      | 0.56216      | -0.35929     |
| 49         | 0.05969      | 0.55979      | -0.35744     |
| 50         | 0.08518      | 0.55599      | -0.35447     |
| 51         | 0.11174      | 0.55087      | -0.35040     |
| 52         | 0.13915      | 0.54455      | -0.34524     |
| 53         | 0.16721      | 0.53716      | -0.33902     |
| 54         | 0.19571      | 0.52881      | -0.33177     |
| 55         | 0.22443      | 0.51961      | -0.32350     |
| 56         | 0.25317      | 0.50969      | -0.31424     |
| 57         | 0.28171      | 0.49917      | -0.30401     |
| 58         | 0.30984      | 0.48816      | -0.29284     |
| 59         | 0.33736      | 0.47678      | -0.28075     |
| 60         | 0.36405      | 0.46515      | -0.26775     |
| 61         | 0.38970      | 0.45339      | -0.25388     |
| 62         | 0.41410      | 0.44161      | -0.23915     |
| 63         | 0.43704      | 0.42994      | -0.22359     |
| 64         | 0.45831      | 0.41849      | -0.20722     |

|     |          |         |          |
|-----|----------|---------|----------|
| 65  | 0.47770  | 0.40738 | -0.19006 |
| 66  | 0.49500  | 0.39673 | -0.17214 |
| 67  | 0.50999  | 0.38666 | -0.15348 |
| 68  | 0.52247  | 0.37728 | -0.13411 |
| 69  | 0.53223  | 0.36872 | -0.11403 |
| 70  | 0.53911  | 0.36106 | -0.09329 |
| 71  | 0.54314  | 0.35431 | -0.07189 |
| 72  | 0.54443  | 0.34842 | -0.04986 |
| 73  | 0.54306  | 0.34338 | -0.02723 |
| 74  | 0.53914  | 0.33915 | -0.00401 |
| 75  | 0.53276  | 0.33570 | 0.01977  |
| 76  | 0.52402  | 0.33301 | 0.04410  |
| 77  | 0.51300  | 0.33103 | 0.06895  |
| 78  | 0.49980  | 0.32975 | 0.09429  |
| 79  | 0.48452  | 0.32912 | 0.12011  |
| 80  | 0.46725  | 0.32913 | 0.14639  |
| 81  | 0.44809  | 0.32974 | 0.17311  |
| 82  | 0.42713  | 0.33092 | 0.20023  |
| 83  | 0.40447  | 0.33264 | 0.22775  |
| 84  | 0.38020  | 0.33488 | 0.25563  |
| 85  | 0.35441  | 0.33759 | 0.28386  |
| 86  | 0.32720  | 0.34075 | 0.31242  |
| 87  | 0.29867  | 0.34434 | 0.34128  |
| 88  | 0.26890  | 0.34832 | 0.37042  |
| 89  | 0.23800  | 0.35265 | 0.39982  |
| 90  | 0.20606  | 0.35732 | 0.42946  |
| 91  | 0.17318  | 0.36229 | 0.45932  |
| 92  | 0.13944  | 0.36753 | 0.48938  |
| 93  | 0.10494  | 0.37301 | 0.51960  |
| 94  | 0.06978  | 0.37870 | 0.54998  |
| 95  | 0.03405  | 0.38457 | 0.58049  |
| 96  | -0.00215 | 0.39059 | 0.61111  |
| 97  | -0.03873 | 0.39673 | 0.64181  |
| 98  | -0.07560 | 0.40296 | 0.67258  |
| 99  | -0.11265 | 0.40925 | 0.70339  |
| 100 | -0.14229 | 0.41428 | 0.72805  |
| 101 | -0.16601 | 0.41831 | 0.74777  |
| 102 | -0.18498 | 0.42153 | 0.76354  |
| 103 | -0.20016 | 0.42410 | 0.77616  |
| 104 | -0.21230 | 0.42617 | 0.78626  |
| 105 | -0.22201 | 0.42781 | 0.79434  |
| 106 | -0.22978 | 0.42913 | 0.80080  |
| 107 | -0.23600 | 0.43019 | 0.80597  |
| 108 | -0.24097 | 0.43103 | 0.81010  |
| 109 | -0.24495 | 0.43171 | 0.81341  |
| 110 | -0.24813 | 0.43225 | 0.81606  |
| 111 | -0.25068 | 0.43268 | 0.81818  |
| 112 | -0.25272 | 0.43303 | 0.81987  |

|     |          |         |         |
|-----|----------|---------|---------|
| 113 | -0.25435 | 0.43330 | 0.82123 |
| 114 | -0.25565 | 0.43353 | 0.82231 |
| 115 | -0.25669 | 0.43370 | 0.82318 |
| 116 | -0.25753 | 0.43384 | 0.82387 |
| 117 | -0.25819 | 0.43396 | 0.82443 |
| 118 | -0.25873 | 0.43405 | 0.82487 |
| 119 | -0.25915 | 0.43412 | 0.82523 |
| 120 | -0.25950 | 0.43418 | 0.82551 |

| FirstBUN | bunX1    | bunX2    | bunX3    |
|----------|----------|----------|----------|
| 0        | 0.02367  | -0.04806 | 0.02438  |
| 1        | 0.01691  | -0.03433 | 0.01741  |
| 2        | 0.00000  | 0.00000  | 0.00000  |
| 3        | -0.04226 | 0.08582  | -0.04353 |
| 4        | -0.08384 | 0.17055  | -0.08651 |
| 5        | -0.12404 | 0.25308  | -0.12838 |
| 6        | -0.16217 | 0.33232  | -0.16857 |
| 7        | -0.19755 | 0.40717  | -0.20654 |
| 8        | -0.22948 | 0.47655  | -0.24173 |
| 9        | -0.25729 | 0.53934  | -0.27358 |
| 10       | -0.28027 | 0.59445  | -0.30154 |
| 11       | -0.29775 | 0.64080  | -0.32505 |
| 12       | -0.30903 | 0.67727  | -0.34355 |
| 13       | -0.31371 | 0.70323  | -0.35672 |
| 14       | -0.31258 | 0.71988  | -0.36515 |
| 15       | -0.30667 | 0.72887  | -0.36969 |
| 16       | -0.29707 | 0.73185  | -0.37114 |
| 17       | -0.28482 | 0.73046  | -0.37036 |
| 18       | -0.27099 | 0.72638  | -0.36816 |
| 19       | -0.25663 | 0.72122  | -0.36536 |
| 20       | -0.24240 | 0.71603  | -0.36250 |
| 21       | -0.22836 | 0.71089  | -0.35960 |
| 22       | -0.21450 | 0.70580  | -0.35667 |
| 23       | -0.20082 | 0.70075  | -0.35371 |
| 24       | -0.18733 | 0.69574  | -0.35072 |
| 25       | -0.17401 | 0.69079  | -0.34769 |
| 26       | -0.16087 | 0.68587  | -0.34464 |
| 27       | -0.14792 | 0.68101  | -0.34155 |
| 28       | -0.13514 | 0.67619  | -0.33843 |
| 29       | -0.12254 | 0.67141  | -0.33528 |
| 30       | -0.11011 | 0.66667  | -0.33210 |
| 31       | -0.09787 | 0.66199  | -0.32889 |
| 32       | -0.08579 | 0.65734  | -0.32565 |
| 33       | -0.07389 | 0.65274  | -0.32238 |
| 34       | -0.06217 | 0.64819  | -0.31907 |
| 35       | -0.05061 | 0.64367  | -0.31574 |
| 36       | -0.03923 | 0.63920  | -0.31238 |
| 37       | -0.02802 | 0.63478  | -0.30899 |
| 38       | -0.01698 | 0.63039  | -0.30556 |
| 39       | -0.00611 | 0.62605  | -0.30211 |
| 40       | 0.00459  | 0.62176  | -0.29863 |
| 41       | 0.01513  | 0.61750  | -0.29512 |
| 42       | 0.02550  | 0.61329  | -0.29158 |
| 43       | 0.03570  | 0.60912  | -0.28801 |
| 44       | 0.04574  | 0.60499  | -0.28442 |
| 45       | 0.05561  | 0.60090  | -0.28079 |
| 46       | 0.06532  | 0.59685  | -0.27713 |

For missing values:

|                 |    |
|-----------------|----|
| BUN Imputation: |    |
| age<=31         | 10 |
| age<=49         | 11 |
| age<=64         | 14 |
| age>64          | 17 |

|    |         |         |          |
|----|---------|---------|----------|
| 47 | 0.07487 | 0.59284 | -0.27345 |
| 48 | 0.08425 | 0.58888 | -0.26974 |
| 49 | 0.09348 | 0.58495 | -0.26600 |
| 50 | 0.10254 | 0.58107 | -0.26223 |
| 51 | 0.11144 | 0.57723 | -0.25844 |
| 52 | 0.12019 | 0.57342 | -0.25461 |
| 53 | 0.12878 | 0.56966 | -0.25076 |
| 54 | 0.13721 | 0.56594 | -0.24688 |
| 55 | 0.14548 | 0.56225 | -0.24298 |
| 56 | 0.15360 | 0.55861 | -0.23904 |
| 57 | 0.16157 | 0.55500 | -0.23508 |
| 58 | 0.16938 | 0.55143 | -0.23110 |
| 59 | 0.17704 | 0.54790 | -0.22708 |
| 60 | 0.18454 | 0.54441 | -0.22304 |
| 61 | 0.19190 | 0.54096 | -0.21898 |
| 62 | 0.19910 | 0.53755 | -0.21488 |
| 63 | 0.20616 | 0.53417 | -0.21077 |
| 64 | 0.21306 | 0.53083 | -0.20662 |
| 65 | 0.21982 | 0.52753 | -0.20245 |
| 66 | 0.22643 | 0.52427 | -0.19825 |
| 67 | 0.23289 | 0.52104 | -0.19403 |
| 68 | 0.23921 | 0.51785 | -0.18978 |
| 69 | 0.24539 | 0.51470 | -0.18551 |
| 70 | 0.25142 | 0.51158 | -0.18121 |
| 71 | 0.25730 | 0.50850 | -0.17689 |
| 72 | 0.26305 | 0.50545 | -0.17254 |
| 73 | 0.26865 | 0.50244 | -0.16817 |
| 74 | 0.27411 | 0.49947 | -0.16377 |
| 75 | 0.27944 | 0.49653 | -0.15935 |
| 76 | 0.28462 | 0.49362 | -0.15490 |
| 77 | 0.28967 | 0.49075 | -0.15043 |
| 78 | 0.29457 | 0.48792 | -0.14594 |
| 79 | 0.29935 | 0.48512 | -0.14142 |
| 80 | 0.30398 | 0.48236 | -0.13688 |
| 81 | 0.30848 | 0.47962 | -0.13231 |
| 82 | 0.31285 | 0.47693 | -0.12773 |
| 83 | 0.31708 | 0.47426 | -0.12311 |
| 84 | 0.32118 | 0.47163 | -0.11848 |
| 85 | 0.32515 | 0.46904 | -0.11382 |
| 86 | 0.32899 | 0.46647 | -0.10914 |
| 87 | 0.33270 | 0.46394 | -0.10444 |
| 88 | 0.33628 | 0.46144 | -0.09971 |
| 89 | 0.33973 | 0.45898 | -0.09496 |
| 90 | 0.34306 | 0.45654 | -0.09019 |
| 91 | 0.34625 | 0.45414 | -0.08540 |
| 92 | 0.34932 | 0.45177 | -0.08058 |
| 93 | 0.35227 | 0.44943 | -0.07574 |
| 94 | 0.35509 | 0.44712 | -0.07088 |

|     |         |         |          |
|-----|---------|---------|----------|
| 95  | 0.35779 | 0.44485 | -0.06600 |
| 96  | 0.36036 | 0.44260 | -0.06110 |
| 97  | 0.36282 | 0.44039 | -0.05618 |
| 98  | 0.36515 | 0.43821 | -0.05123 |
| 99  | 0.36736 | 0.43605 | -0.04627 |
| 100 | 0.36945 | 0.43393 | -0.04128 |
| 101 | 0.37143 | 0.43184 | -0.03628 |
| 102 | 0.37329 | 0.42977 | -0.03125 |
| 103 | 0.37502 | 0.42774 | -0.02620 |
| 104 | 0.37665 | 0.42573 | -0.02113 |
| 105 | 0.37816 | 0.42376 | -0.01604 |
| 106 | 0.37955 | 0.42181 | -0.01094 |
| 107 | 0.38083 | 0.41989 | -0.00581 |
| 108 | 0.38200 | 0.41801 | -0.00066 |
| 109 | 0.38305 | 0.41614 | 0.00451  |
| 110 | 0.38400 | 0.41431 | 0.00970  |
| 111 | 0.38483 | 0.41251 | 0.01490  |
| 112 | 0.38556 | 0.41073 | 0.02013  |
| 113 | 0.38617 | 0.40898 | 0.02537  |
| 114 | 0.38668 | 0.40726 | 0.03064  |
| 115 | 0.38708 | 0.40556 | 0.03592  |
| 116 | 0.38737 | 0.40389 | 0.04122  |
| 117 | 0.38756 | 0.40225 | 0.04654  |
| 118 | 0.38764 | 0.40063 | 0.05187  |
| 119 | 0.38762 | 0.39905 | 0.05723  |
| 120 | 0.38750 | 0.39748 | 0.06260  |
| 121 | 0.38728 | 0.39594 | 0.06800  |
| 122 | 0.38695 | 0.39443 | 0.07340  |
| 123 | 0.38652 | 0.39295 | 0.07883  |
| 124 | 0.38600 | 0.39148 | 0.08428  |
| 125 | 0.38537 | 0.39005 | 0.08974  |
| 126 | 0.38465 | 0.38864 | 0.09522  |
| 127 | 0.38382 | 0.38725 | 0.10071  |
| 128 | 0.38291 | 0.38589 | 0.10622  |
| 129 | 0.38189 | 0.38455 | 0.11175  |
| 130 | 0.38079 | 0.38323 | 0.11730  |
| 131 | 0.37958 | 0.38194 | 0.12286  |
| 132 | 0.37829 | 0.38068 | 0.12844  |
| 133 | 0.37690 | 0.37943 | 0.13403  |
| 134 | 0.37542 | 0.37821 | 0.13965  |
| 135 | 0.37385 | 0.37701 | 0.14527  |
| 136 | 0.37219 | 0.37584 | 0.15091  |
| 137 | 0.37044 | 0.37469 | 0.15657  |
| 138 | 0.36860 | 0.37356 | 0.16225  |
| 139 | 0.36668 | 0.37245 | 0.16793  |
| 140 | 0.36467 | 0.37136 | 0.17364  |
| 141 | 0.36257 | 0.37030 | 0.17936  |
| 142 | 0.36038 | 0.36925 | 0.18509  |



|     |         |         |         |
|-----|---------|---------|---------|
| 143 | 0.35812 | 0.36823 | 0.19084 |
| 144 | 0.35577 | 0.36723 | 0.19660 |
| 145 | 0.35333 | 0.36625 | 0.20238 |
| 146 | 0.35082 | 0.36529 | 0.20817 |
| 147 | 0.34822 | 0.36435 | 0.21398 |
| 148 | 0.34555 | 0.36344 | 0.21980 |
| 149 | 0.34279 | 0.36254 | 0.22563 |
| 150 | 0.34009 | 0.36166 | 0.23135 |
| 151 | 0.33745 | 0.36079 | 0.23695 |
| 152 | 0.33485 | 0.35995 | 0.24244 |
| 153 | 0.33231 | 0.35912 | 0.24782 |
| 154 | 0.32982 | 0.35831 | 0.25309 |
| 155 | 0.32738 | 0.35751 | 0.25826 |
| 156 | 0.32499 | 0.35673 | 0.26333 |
| 157 | 0.32265 | 0.35597 | 0.26829 |
| 158 | 0.32035 | 0.35522 | 0.27315 |
| 159 | 0.31810 | 0.35448 | 0.27792 |
| 160 | 0.31589 | 0.35376 | 0.28259 |
| 161 | 0.31373 | 0.35306 | 0.28717 |
| 162 | 0.31161 | 0.35237 | 0.29165 |
| 163 | 0.30954 | 0.35169 | 0.29605 |
| 164 | 0.30750 | 0.35103 | 0.30036 |
| 165 | 0.30551 | 0.35038 | 0.30458 |
| 166 | 0.30355 | 0.34974 | 0.30872 |
| 167 | 0.30164 | 0.34911 | 0.31277 |
| 168 | 0.29976 | 0.34850 | 0.31675 |
| 169 | 0.29792 | 0.34790 | 0.32064 |
| 170 | 0.29612 | 0.34732 | 0.32446 |
| 171 | 0.29435 | 0.34674 | 0.32820 |
| 172 | 0.29262 | 0.34617 | 0.33187 |
| 173 | 0.29092 | 0.34562 | 0.33546 |
| 174 | 0.28926 | 0.34508 | 0.33898 |
| 175 | 0.28763 | 0.34455 | 0.34243 |
| 176 | 0.28604 | 0.34403 | 0.34581 |
| 177 | 0.28447 | 0.34352 | 0.34912 |
| 178 | 0.28294 | 0.34302 | 0.35237 |
| 179 | 0.28143 | 0.34253 | 0.35555 |
| 180 | 0.27996 | 0.34205 | 0.35867 |
| 181 | 0.27852 | 0.34158 | 0.36173 |
| 182 | 0.27710 | 0.34111 | 0.36472 |
| 183 | 0.27572 | 0.34066 | 0.36766 |
| 184 | 0.27436 | 0.34022 | 0.37053 |
| 185 | 0.27303 | 0.33978 | 0.37335 |
| 186 | 0.27172 | 0.33936 | 0.37611 |
| 187 | 0.27044 | 0.33894 | 0.37882 |
| 188 | 0.26919 | 0.33853 | 0.38148 |
| 189 | 0.26796 | 0.33813 | 0.38408 |
| 190 | 0.26676 | 0.33774 | 0.38662 |

|     |         |         |         |
|-----|---------|---------|---------|
| 191 | 0.26558 | 0.33736 | 0.38912 |
| 192 | 0.26442 | 0.33698 | 0.39157 |
| 193 | 0.26329 | 0.33661 | 0.39397 |
| 194 | 0.26218 | 0.33625 | 0.39632 |
| 195 | 0.26109 | 0.33589 | 0.39862 |
| 196 | 0.26003 | 0.33555 | 0.40088 |
| 197 | 0.25898 | 0.33520 | 0.40309 |
| 198 | 0.25796 | 0.33487 | 0.40526 |
| 199 | 0.25696 | 0.33454 | 0.40738 |
| 200 | 0.25597 | 0.33422 | 0.40946 |
| 201 | 0.25501 | 0.33391 | 0.41150 |
| 202 | 0.25407 | 0.33360 | 0.41350 |
| 203 | 0.25314 | 0.33330 | 0.41546 |
| 204 | 0.25223 | 0.33300 | 0.41738 |
| 205 | 0.25134 | 0.33271 | 0.41926 |
| 206 | 0.25047 | 0.33243 | 0.42111 |
| 207 | 0.24962 | 0.33215 | 0.42292 |
| 208 | 0.24878 | 0.33188 | 0.42469 |
| 209 | 0.24796 | 0.33161 | 0.42642 |
| 210 | 0.24716 | 0.33135 | 0.42812 |
| 211 | 0.24637 | 0.33109 | 0.42979 |
| 212 | 0.24560 | 0.33084 | 0.43143 |
| 213 | 0.24484 | 0.33059 | 0.43303 |
| 214 | 0.24410 | 0.33035 | 0.43460 |
| 215 | 0.24338 | 0.33012 | 0.43613 |
| 216 | 0.24267 | 0.32988 | 0.43764 |
| 217 | 0.24197 | 0.32966 | 0.43912 |
| 218 | 0.24128 | 0.32943 | 0.44056 |
| 219 | 0.24062 | 0.32921 | 0.44198 |
| 220 | 0.23996 | 0.32900 | 0.44337 |
| 221 | 0.23932 | 0.32879 | 0.44473 |
| 222 | 0.23868 | 0.32858 | 0.44607 |
| 223 | 0.23807 | 0.32838 | 0.44738 |
| 224 | 0.23746 | 0.32819 | 0.44866 |
| 225 | 0.23687 | 0.32799 | 0.44992 |
| 226 | 0.23629 | 0.32780 | 0.45115 |
| 227 | 0.23572 | 0.32762 | 0.45235 |
| 228 | 0.23516 | 0.32743 | 0.45354 |
| 229 | 0.23461 | 0.32726 | 0.45469 |
| 230 | 0.23407 | 0.32708 | 0.45583 |
| 231 | 0.23355 | 0.32691 | 0.45694 |
| 232 | 0.23303 | 0.32674 | 0.45803 |
| 233 | 0.23253 | 0.32658 | 0.45910 |
| 234 | 0.23203 | 0.32642 | 0.46015 |
| 235 | 0.23155 | 0.32626 | 0.46118 |
| 236 | 0.23107 | 0.32610 | 0.46218 |
| 237 | 0.23061 | 0.32595 | 0.46317 |
| 238 | 0.23015 | 0.32580 | 0.46414 |

|     |         |         |         |
|-----|---------|---------|---------|
| 239 | 0.22971 | 0.32566 | 0.46508 |
| 240 | 0.22927 | 0.32551 | 0.46601 |
| 241 | 0.22884 | 0.32537 | 0.46692 |
| 242 | 0.22842 | 0.32524 | 0.46781 |
| 243 | 0.22800 | 0.32510 | 0.46868 |
| 244 | 0.22760 | 0.32497 | 0.46954 |
| 245 | 0.22720 | 0.32484 | 0.47038 |
| 246 | 0.22682 | 0.32471 | 0.47120 |
| 247 | 0.22644 | 0.32459 | 0.47201 |
| 248 | 0.22606 | 0.32447 | 0.47280 |
| 249 | 0.22570 | 0.32435 | 0.47357 |
| 250 | 0.22534 | 0.32423 | 0.47433 |

| <b>FirstRR</b> | <b>rrX1</b> | <b>rrX2</b> | <b>rrX3</b> |
|----------------|-------------|-------------|-------------|
| 5              | 0.04430     | -0.09470    | 0.05014     |
| 6              | 0.04419     | -0.09447    | 0.05001     |
| 7              | 0.04392     | -0.09389    | 0.04971     |
| 8              | 0.04324     | -0.09243    | 0.04893     |
| 9              | 0.04153     | -0.08879    | 0.04701     |
| 10             | 0.03727     | -0.07968    | 0.04218     |
| 11             | 0.02662     | -0.05692    | 0.03013     |
| 12             | 0.00000     | 0.00000     | 0.00000     |
| 13             | -0.06656    | 0.14229     | -0.07533    |
| 14             | -0.12799    | 0.27873     | -0.14756    |
| 15             | -0.17915    | 0.40347     | -0.21360    |
| 16             | -0.21492    | 0.51067     | -0.27035    |
| 17             | -0.23015    | 0.59447     | -0.31472    |
| 18             | -0.21971    | 0.64903     | -0.34360    |
| 19             | -0.18092    | 0.67101     | -0.35514    |
| 20             | -0.12086    | 0.66715     | -0.35238    |
| 21             | -0.04904    | 0.64669     | -0.33961    |
| 22             | 0.02499     | 0.61886     | -0.32110    |
| 23             | 0.09334     | 0.59137     | -0.30043    |
| 24             | 0.15461     | 0.56570     | -0.27835    |
| 25             | 0.20904     | 0.54180     | -0.25491    |
| 26             | 0.25684     | 0.51961     | -0.23015    |
| 27             | 0.29825     | 0.49907     | -0.20413    |
| 28             | 0.33349     | 0.48012     | -0.17687    |
| 29             | 0.36280     | 0.46269     | -0.14844    |
| 30             | 0.38641     | 0.44675     | -0.11887    |
| 31             | 0.40453     | 0.43221     | -0.08820    |
| 32             | 0.41740     | 0.41903     | -0.05650    |
| 33             | 0.42525     | 0.40714     | -0.02380    |
| 34             | 0.42830     | 0.39649     | 0.00986     |
| 35             | 0.42679     | 0.38702     | 0.04443     |
| 36             | 0.42094     | 0.37867     | 0.07986     |
| 37             | 0.41097     | 0.37138     | 0.11610     |
| 38             | 0.39713     | 0.36509     | 0.15312     |
| 39             | 0.37964     | 0.35974     | 0.19087     |
| 40             | 0.35872     | 0.35527     | 0.22930     |
| 41             | 0.33460     | 0.35163     | 0.26836     |
| 42             | 0.30752     | 0.34876     | 0.30801     |
| 43             | 0.27769     | 0.34659     | 0.34821     |
| 44             | 0.24536     | 0.34507     | 0.38891     |
| 45             | 0.21074     | 0.34414     | 0.43006     |
| 46             | 0.17407     | 0.34374     | 0.47162     |
| 47             | 0.13557     | 0.34380     | 0.51354     |
| 48             | 0.09976     | 0.34387     | 0.55253     |
| 49             | 0.06646     | 0.34393     | 0.58879     |
| 50             | 0.03549     | 0.34398     | 0.62251     |
| 51             | 0.00669     | 0.34404     | 0.65387     |

|    |          |         |         |
|----|----------|---------|---------|
| 52 | -0.02009 | 0.34408 | 0.68304 |
| 53 | -0.04500 | 0.34413 | 0.71016 |
| 54 | -0.06816 | 0.34417 | 0.73539 |
| 55 | -0.08971 | 0.34421 | 0.75885 |
| 56 | -0.10974 | 0.34425 | 0.78066 |
| 57 | -0.12838 | 0.34428 | 0.80095 |
| 58 | -0.14571 | 0.34431 | 0.81982 |
| 59 | -0.16182 | 0.34434 | 0.83737 |
| 60 | -0.17681 | 0.34437 | 0.85369 |
| 61 | -0.19075 | 0.34439 | 0.86887 |
| 62 | -0.20371 | 0.34442 | 0.88299 |
| 63 | -0.21577 | 0.34444 | 0.89612 |
| 64 | -0.22698 | 0.34446 | 0.90832 |
| 65 | -0.23741 | 0.34448 | 0.91968 |
| 66 | -0.24710 | 0.34449 | 0.93024 |
| 67 | -0.25612 | 0.34451 | 0.94006 |
| 68 | -0.26451 | 0.34452 | 0.94919 |
| 69 | -0.27231 | 0.34454 | 0.95768 |
| 70 | -0.27956 | 0.34455 | 0.96558 |
| 71 | -0.28631 | 0.34456 | 0.97293 |
| 72 | -0.29258 | 0.34458 | 0.97976 |
| 73 | -0.29842 | 0.34459 | 0.98611 |
| 74 | -0.30384 | 0.34460 | 0.99202 |
| 75 | -0.30889 | 0.34460 | 0.99752 |
| 76 | -0.31358 | 0.34461 | 1.00263 |
| 77 | -0.31795 | 0.34462 | 1.00738 |
| 78 | -0.32201 | 0.34463 | 1.01180 |
| 79 | -0.32578 | 0.34464 | 1.01591 |
| 80 | -0.32929 | 0.34464 | 1.01974 |
